# Supplementary material for: RRNPP-type quorum sensing affects solvent formation and sporulation in Clostridium acetobutylicum
Source: PubMed Central journal article supplement (PMC7376267; doi:10.1099/mic.0.000916), 2020-04-28
Supplement: mic-166-579-s001.pdf [file mic-166-579-s001.pdf]

Figure S1

A)

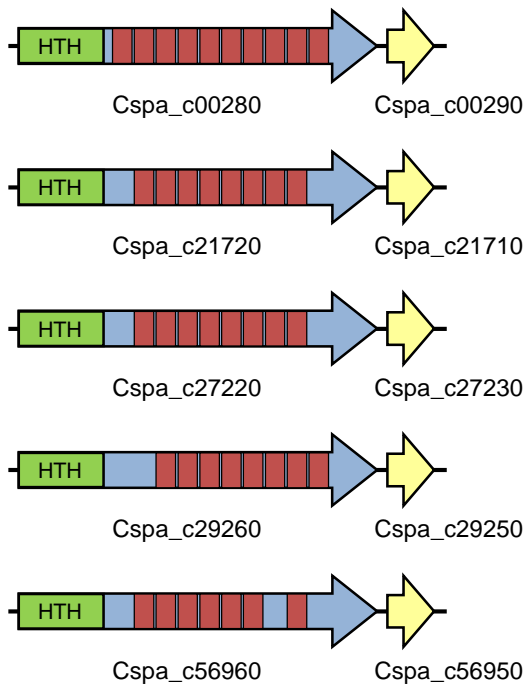

B)

|             | positively charged | hydrophobic                   | predicted mature signalling peptide |            |                |         |      |  |
|-------------|--------------------|-------------------------------|-------------------------------------|------------|----------------|---------|------|--|
|             | —————              | —————                         | .....                               |            |                |         |      |  |
| Cspa_c29250 | MKKKLI             | KGV--SLFLSC--FALTLVLNATTA---- | KTNNSNPAKVHLD                       | ESAPWG- 46 |                |         |      |  |
| Cspa_c27230 | MKKLLLL            | TMVACVLLSNVAFAAATKTTSTTT      | DTKSTITS--SSG                       | EKFHLD     | SRDPDGW 54     |         |      |  |
| Cspa_c00290 | MKKI               | ILAVIATSMLLTNVAFAS            | KTTHKNT----                         | NST        | KVTQNNVYSVNSID | PH-- 49 |      |  |
| Cspa_c21710 | MKKI               | ILAVMATSMLLTNVAFAS            | KTTHTKIT                            | KNSTVSSVD  | PNNVYHLNLTLD   | PN-- 53 |      |  |
| Cspa_c56950 | MKKI               | ILAVIATSMLLTNVAFAS            | KTTHTNTG                            | KNSTVSSVK  | QNSMYHLNLTLD   | PY-- 53 |      |  |
|             | ***                | :: :                          | :                                   | ::*        | ** * . . . . . | ::      | :: * |  |

**Figure S1.** Schematic representation of *C. saccharoperbutylacetonicum* RNPP quorum sensing gene clusters (A) and alignment of putative signalling peptide precursor sequences (B).

(A) Four RNPP quorum sensing gene clusters have been identified, each encoding an RNPP-type regulator (large arrows) and a signalling peptide precursor (short yellow arrows). The locus tags for each system are provided. Regions encoding a putative helix-turn-helix motif (HTH, green) and tetratricopeptide repeat domains (red) are indicated. (B) The Clustal Omega amino acid sequence alignment shows the four predicted Qsp proteins. A conserved proline in the C-terminal region is indicated with red font; blue and green fonts indicate positively (K, R) and negatively charged (D, E) amino acids, respectively. Identical (\*), conserved (:), and semi-conserved substitutions (.) are shown. Numbers indicate the length of the different precursor proteins. Positively charged, hydrophobic, and predicted signalling peptide-encoding regions are indicated with blue, grey, and red lines, respectively.

Figure S2

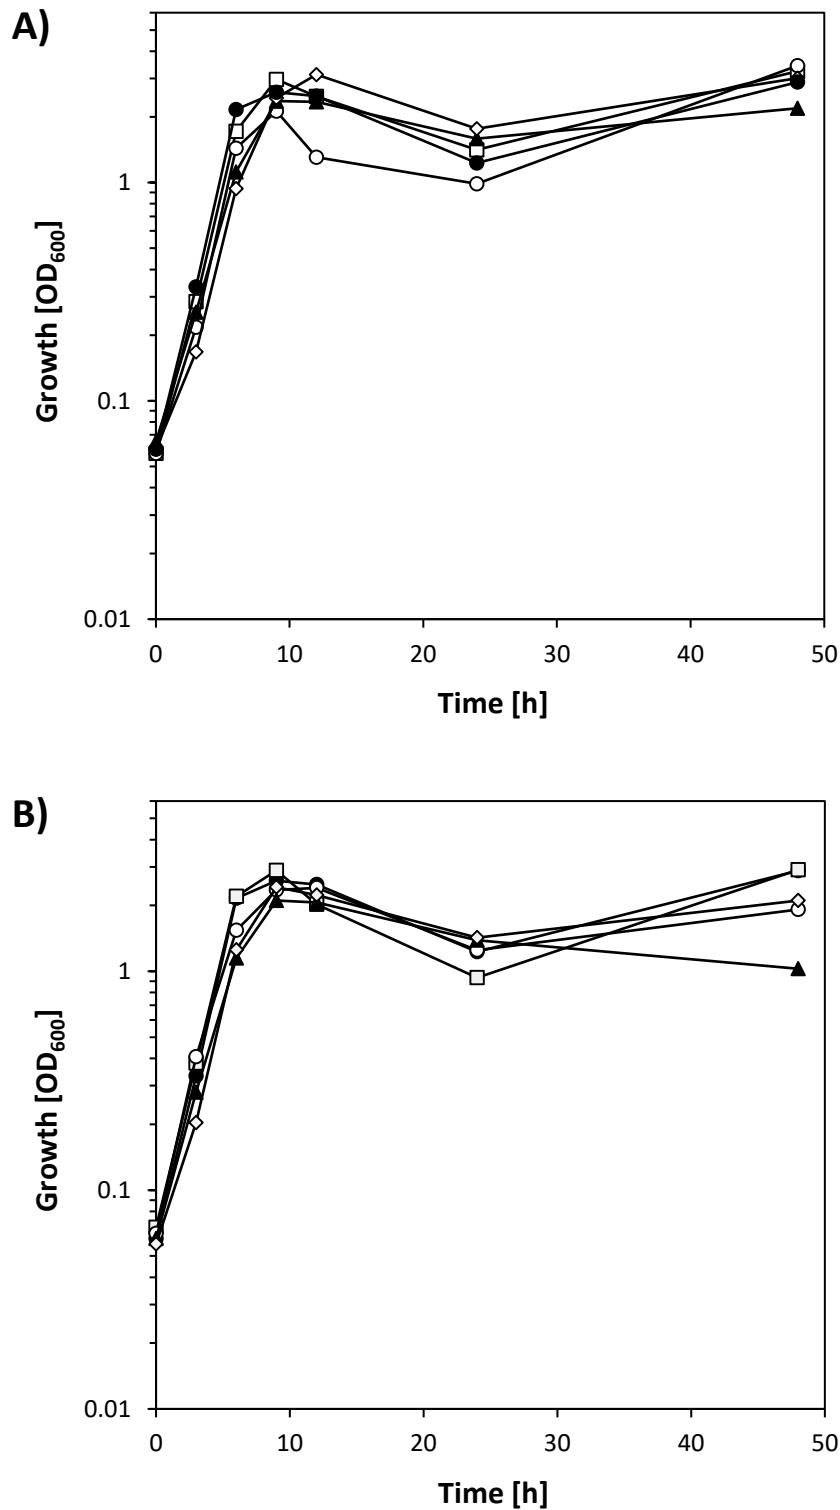

**Figure S2.** Growth of *C. acetobutylicum* ATCC 824 and derived *qsr* mutants in CBMS medium.

The data represent the mean of three independently cultures. A) Wild type (closed circles); *qsrA* (open squares), *qsrB* (open circles), *qsrC* (closed triangles) and *qsrD* (open diamonds) mutants. B) Wild type (closed circles); *qsrE* (open squares), *qsrF* (open circles), *qsrG* (closed triangles) and *qsrH* (open diamonds) mutants.

Figure S3

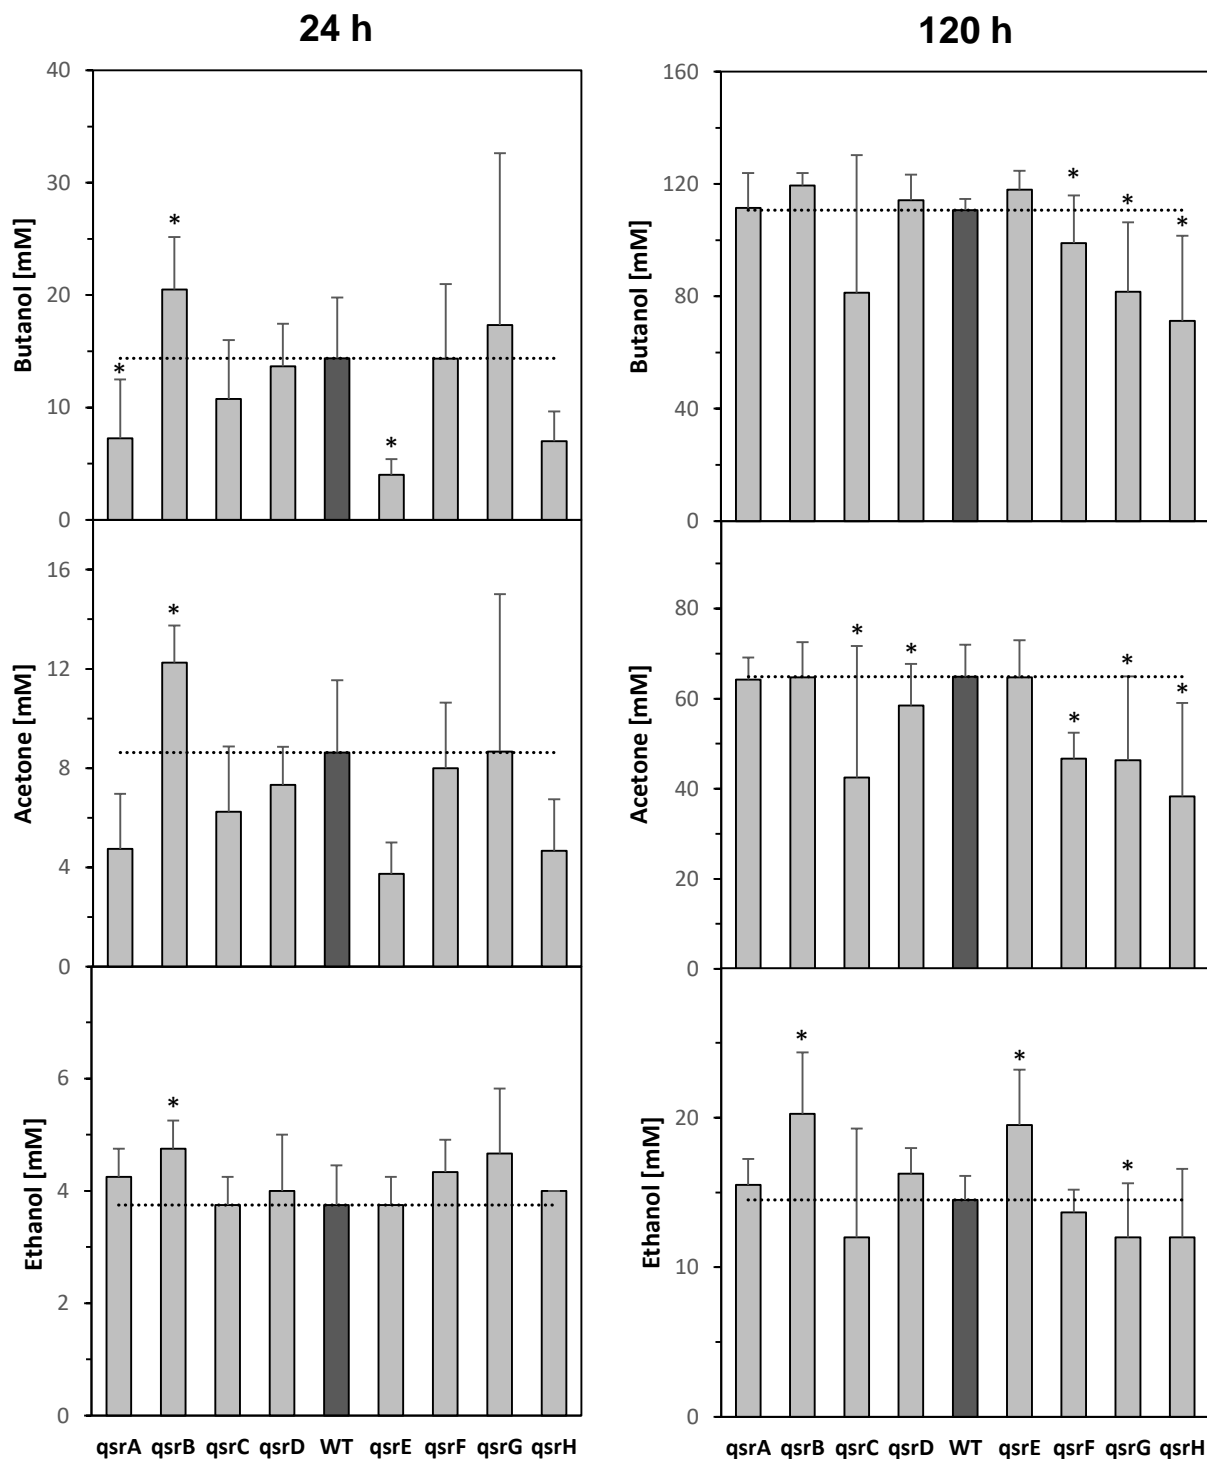

**Figure S3.** Solvent formation by *C. acetobutylicum* *qsr* mutants.

Formation of butanol (A), acetone (B) and ethanol (C) was monitored in CBMS broth after 24 h (left hand panels) and 124 h (right hand panels) for all eight *qsr* mutants and compared to the ATCC 824 parent strain. (B) After 72 h, culture supernatant samples were taken and analysed for the produced acids (acetate, checks; butyrate, lines) and solvents (butanol, white; acetone, grey; ethanol, black). The data represent the mean of three independent CBMS cultures with error bars indicating the standard deviation. Significant differences ( $p \leq 0.05$ ) compared to the wild type are indicated by an asterisk.

Figure S4

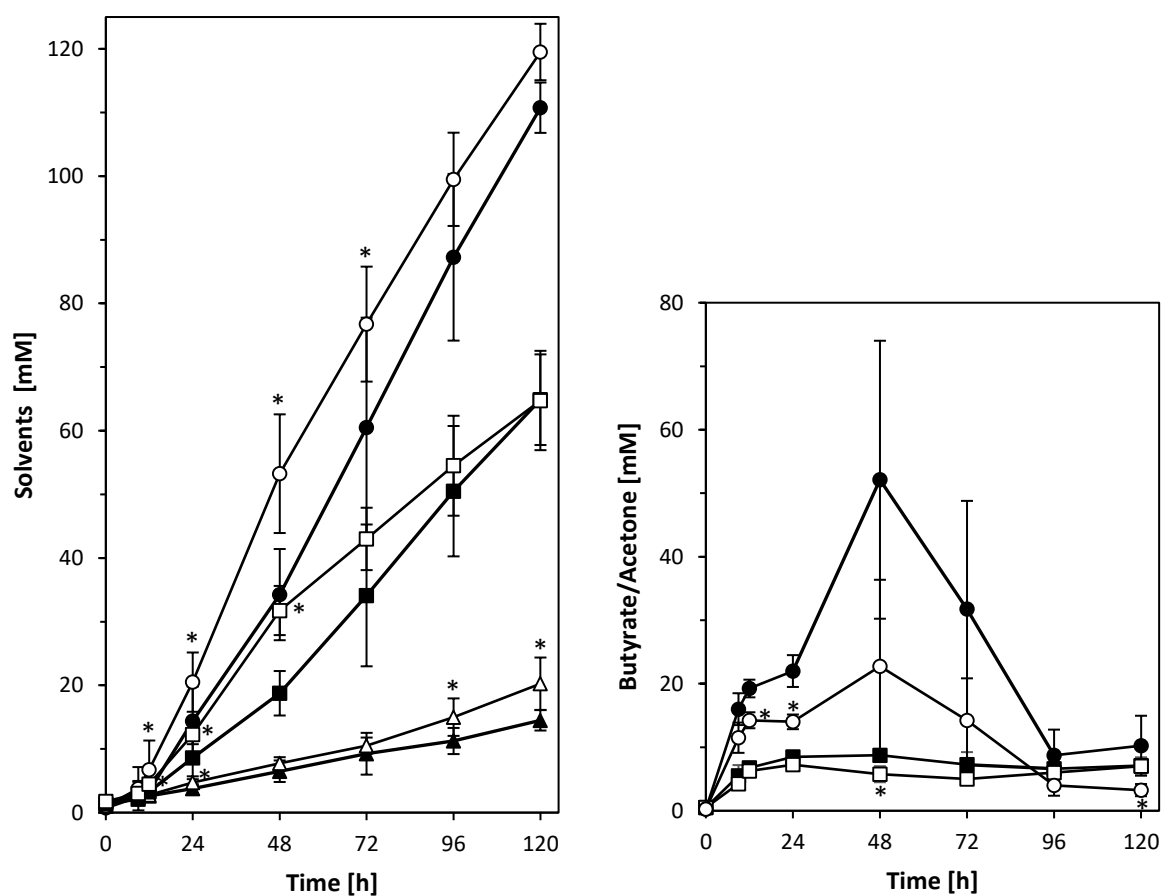

**Figure S4.** Solvent and acid production by *C. acetobutylicum* *qsrB* mutants

(A) Concentration of butanol (circles), acetone (squares) and ethanol (triangles) in the culture supernatant at the indicated time points. Open and closed symbols represent *qsrB* mutant and ATTC 824 parent strain data, respectively. (B) Concentration of butyrate (circles) and acetate (squares) in the culture supernatant at the indicated time point. Open and closed symbols represent *qsrB* mutant and ATTC 824 parent strain data, respectively. Data represent the mean of three independent cultures with error bars indicating the standard deviation. Significant differences ( $p \leq 0.05$ ) compared to the wild type are indicated by an asterisk next to the relevant data point.

Figure S5

|                                                              | Peptide<br>activity |
|--------------------------------------------------------------|---------------------|
| MLPKKSNKFILVLLILCAIVFVSAFALNTSGTRSL <b>LGAEPTWGW</b> NISKLLF |                     |
| TRSL <b>LGAEPTWGW</b> NISKLLF                                | ++                  |
| SL <b>LGAEPTWGW</b> NISKLLF                                  | +++                 |
| <b>LGAEPTWGW</b> NISKLLF                                     | ++                  |
| AE <b>PTWGW</b> NISKLLF                                      | ++                  |
| <b>PTWGW</b> NISKLLF                                         | -                   |
| AE <b>PTWGW</b>                                              | +++                 |
| <b>LGAEPTWGW</b>                                             | +++                 |
| SL <b>LGAEPTWGW</b>                                          | +++                 |
| TRSL <b>LGAEPTWGW</b>                                        | +++                 |
| SL <b>LGAE</b>                                               | -                   |
| TRSL <b>LGAE</b>                                             | -                   |
| SGTRSL <b>LGAE</b>                                           | -                   |
| NISKLLF                                                      | -                   |

**Figure S5.** Synthetic peptides alleviate *qsrB*-mediated repression of solvent formation.

The indicated synthetic peptides dissolved in DMSO were added to CBMS cultures of *C. acetobutylicum* pMTL85141-*qsrB* after 4 h of growth to a final concentration of 10  $\mu$ M. Equivalent DMSO controls were performed for *C. acetobutylicum* pMTL85141 and *C. acetobutylicum* pMTL85141-*qsrB*, respectively. Triplicate cultures were grown for 5 days and analysed for final butanol titres. The ability to overcome *qsrB*-mediated repression of butanol formation was scored in comparison to the DMSO controls as follows: -, no significant difference to the *C. acetobutylicum* pMTL85141-*qsrB* DMSO control; ++, final butanol levels 40-66% of the *C. acetobutylicum* pMTL85141 DMSO control; +++, final butanol levels 67-100% of the *C. acetobutylicum* pMTL85141 DMSO control. *C. acetobutylicum* pMTL85141-*qsrB* DMSO and *C. acetobutylicum* pMTL85141 DMSO controls produced 14 $\pm$ 8 mM and 123 $\pm$ 17 mM of butanol, respectively. The complete QspB sequence is given at the top with the three conserved amino acid positions (leucine, proline, tryptophan) in the C-terminal region indicated by bold red lettering.

**TABLE S1.** Formation of heat resistant endospores by *qsr* mutants

| Strain                                | Heat-resistant CFU/ml | p value <sup>1</sup> |
|---------------------------------------|-----------------------|----------------------|
| <i>C. acetobutylicum qsrA::CTermB</i> | $9.50 \times 10^7$    | 0.561                |
| <i>C. acetobutylicum qsrB::CTermB</i> | $1.18 \times 10^8$    | 0.929                |
| <i>C. acetobutylicum qsrC::CTermB</i> | $7.57 \times 10^7$    | 0.323                |
| <i>C. acetobutylicum qsrD::CTermB</i> | $8.91 \times 10^7$    | 0.473                |
| <i>C. acetobutylicum qsrE::CTermB</i> | $1.26 \times 10^8$    | 0.743                |
| <i>C. acetobutylicum qsrF::CTermB</i> | $8.22 \times 10^7$    | 0.339                |
| <i>C. acetobutylicum qsrG::CTermB</i> | $3.85 \times 10^7$    | *0.036               |
| <i>C. acetobutylicum qsrH::CTermB</i> | $1.21 \times 10^8$    | 0.857                |
| <i>C. acetobutylicum</i> ATCC 824     | $1.15 \times 10^8$    | -                    |

<sup>1</sup>Significant differences to the wild type are indicated by an asterisk.

**Table S2.** Bacterial strains used in this study

| <b>Strain</b>                                                        | <b>Relevant properties</b>                                                                                                                                                                                          | <b>Source/reference</b>                                        |
|----------------------------------------------------------------------|---------------------------------------------------------------------------------------------------------------------------------------------------------------------------------------------------------------------|----------------------------------------------------------------|
| <i>E. coli</i> Top10                                                 | F- <i>mcrA</i> $\Delta$ ( <i>mrr-hsdRMS-mcrBC</i> )<br>$\Phi$ 80 <i>lacZ</i> $\Delta$ M15 $\Delta$ <i>lacX74 recA1</i><br><i>araD139</i> $\Delta$ ( <i>ara leu</i> )7697 <i>galU galK rpsL</i> (StrR) endA1<br>nupG | Invitrogen                                                     |
| <i>E. coli</i> Top 10 pAN2                                           | <i>E. coli</i> Top 10 with methylation plasmid pAN2<br>containing the $\phi$ 3TI methyltransferase                                                                                                                  | Heap et al. (2007)                                             |
| <i>C. acetobutylicum</i> ATCC 824                                    | <i>C. acetobutylicum</i> ATCC 824 wild type                                                                                                                                                                         | Prof. Hubert Bahl,<br>University of Rostock<br>(COSMIC-strain) |
| <i>C. acetobutylicum</i> <i>qsrA</i> ::CTermB                        | <i>C. acetobutylicum</i> ATCC 824 <i>qsrA</i> Clostron mutant                                                                                                                                                       | This work                                                      |
| <i>C. acetobutylicum</i> <i>qsrB</i> ::CTermB                        | <i>C. acetobutylicum</i> ATCC 824 <i>qsrB</i> Clostron mutant                                                                                                                                                       | This work                                                      |
| <i>C. acetobutylicum</i> <i>qsrC</i> ::CTermB                        | <i>C. acetobutylicum</i> ATCC 824 <i>qsrC</i> Clostron mutant                                                                                                                                                       | This work                                                      |
| <i>C. acetobutylicum</i> <i>qsrD</i> ::CTermB                        | <i>C. acetobutylicum</i> ATCC 824 <i>qsrD</i> Clostron mutant                                                                                                                                                       | This work                                                      |
| <i>C. acetobutylicum</i> <i>qsrE</i> ::CTermB                        | <i>C. acetobutylicum</i> ATCC 824 <i>qsrE</i> Clostron mutant                                                                                                                                                       | This work                                                      |
| <i>C. acetobutylicum</i> <i>qsrF</i> ::CTermB                        | <i>C. acetobutylicum</i> ATCC 824 <i>qsrF</i> Clostron mutant                                                                                                                                                       | This work                                                      |
| <i>C. acetobutylicum</i> <i>qsrG</i> ::CTermB                        | <i>C. acetobutylicum</i> ATCC 824 <i>qsrG</i> Clostron mutant                                                                                                                                                       | This work                                                      |
| <i>C. acetobutylicum</i> <i>qsrH</i> ::CTermB                        | <i>C. acetobutylicum</i> ATCC 824 <i>qsrH</i> Clostron mutant                                                                                                                                                       | This work                                                      |
| <i>C. acetobutylicum</i> <i>qspB</i> ::CTermB                        | <i>C. acetobutylicum</i> ATCC 824 <i>qspB</i> Clostron mutant                                                                                                                                                       | This work                                                      |
| <i>C. acetobutylicum</i> pMTL85141                                   | ATTC 824 wild type with empty pMTL85141 vector                                                                                                                                                                      | This work                                                      |
| <i>C. acetobutylicum</i> pMTL85143                                   | ATTC 824 wild type with empty pMTL85143 vector                                                                                                                                                                      | This work                                                      |
| <i>C. acetobutylicum</i> <i>qsrB</i> ::CTermB pMTL85141              | <i>qsrB</i> mutant with empty ATTC 824 wild type with<br>empty pMTL85141 vector                                                                                                                                     | This work                                                      |
| <i>C. acetobutylicum</i> <i>qsrB</i> ::CTermB pMTL85141- <i>qsrB</i> | Complemented <i>qsrB</i> mutant carrying pMTL85141- <i>qsrB</i>                                                                                                                                                     | This work                                                      |
| <i>C. acetobutylicum</i> <i>qsrB</i> ::CTermB pMTL85143              | <i>qsrB</i> mutant with empty pMTL85143 vector                                                                                                                                                                      | This work                                                      |
| <i>C. acetobutylicum</i> <i>qsrB</i> ::CTermB pMTL85143- <i>qsrB</i> | Complemented <i>qsrB</i> mutant carrying pMTL85143- <i>qsrB</i>                                                                                                                                                     | This work                                                      |
| <i>C. acetobutylicum</i> pMTL85141- <i>qsrB</i>                      | <i>qsrB</i> overexpressing ATTC 824 wild type carrying<br>pMTL85141- <i>qsrB</i>                                                                                                                                    | This work                                                      |
| <i>C. acetobutylicum</i> pMTL85143- <i>qsrB</i>                      | <i>qsrB</i> overexpressing ATTC 824 wild type carrying<br>pMTL85143- <i>qsrB</i>                                                                                                                                    | This work                                                      |
| <i>C. acetobutylicum</i> <i>qspB</i> ::CTermB pMTL85143              | <i>qspB</i> mutant with empty plasmid                                                                                                                                                                               | This work                                                      |
| <i>C. acetobutylicum</i> <i>qspB</i> ::CTermB pMTL85143- <i>qspB</i> | Complemented <i>qspB</i> mutant                                                                                                                                                                                     | This work                                                      |
| <i>C. acetobutylicum</i> pMTL85143- <i>qspB</i>                      | <i>qspB</i> overexpressing ATTC 824 wild type carrying<br>pMTL85143- <i>qspB</i>                                                                                                                                    | This work                                                      |

**Table S3.** Plasmids used in this study

| Plasmid                             | Relevant properties                                                                            | Source                             |
|-------------------------------------|------------------------------------------------------------------------------------------------|------------------------------------|
| pAN2                                | Plasmid containing $\phi$ 3TI methyltransferase                                                | Heap et al. (2007)                 |
| pCR2.1-TOPO                         | A plasmid that is supplied linearized with A-overhangs for convenient cloning of PCR fragments | Invitrogen                         |
| pMTL007C-E2:: <i>qsrA</i> -102 103A | Clostron plasmid retargeted to <i>qsrA</i> <sup>1</sup>                                        | This study                         |
| pMTL007C-E2:: <i>qsrB</i> -102 103S | Clostron plasmid retargeted to <i>qsrB</i> <sup>1</sup>                                        | This study                         |
| pMTL007C-E2:: <i>qsrC</i> -102 103S | Clostron plasmid retargeted to <i>qsrC</i> <sup>1</sup>                                        | This study                         |
| pMTL007C-E2:: <i>qsrD</i> -49 50A   | Clostron plasmid retargeted to <i>qsrD</i> <sup>1</sup>                                        | This study                         |
| pMTL007C-E2:: <i>qsrES</i> -58 59A  | Clostron plasmid retargeted to <i>qsrE</i> <sup>1</sup>                                        | This study                         |
| pMTL007C-E2:: <i>qsrF</i> -107 108A | Clostron plasmid retargeted to <i>qsrF</i> <sup>1</sup>                                        | This study                         |
| pMTL007C-E2:: <i>qsrG</i> -93 94A   | Clostron plasmid retargeted to <i>qsrG</i> <sup>1</sup>                                        | This study                         |
| pMTL007C-E2:: <i>qsrH</i> -58 59A   | Clostron plasmid retargeted to <i>qsrH</i> <sup>1</sup>                                        | This study                         |
| pMTL007C-E2:: <i>qspB</i> -53/54A   | Clostron plasmid retargeted to <i>qspB</i> <sup>1</sup>                                        | This study                         |
| pMTL85141                           | Clostridium modular plasmid containing <i>catP</i>                                             | Heap et al. (2009)                 |
| pMTL85143                           | pMTL85141 with <i>C. sporogenes</i> ferredoxin promoter upstream of multiple cloning site      | Dr Ying Zhang, Univ. of Nottingham |
| pMTL85141- <i>qsrB</i>              | pMTL85141 containing <i>qsrB</i> coding region and 351 bp non-coding region upstream           | This study                         |
| pMTL85143- <i>qsrB</i>              | pMTL85143 containing <i>qsrB</i> coding region                                                 | This study                         |
| pMTL85143- <i>qspB</i>              | pMTL85143 containing <i>qspB</i> coding region                                                 | This study                         |

<sup>1</sup>Numbers following the gene name indicate the predicted insertion site of the encoded Clostron derivative, with S and A denoting sense and anti-sense orientation, respectively.



**Table S4. Oligonucleotides used in this study**

| Oligonucleotide                       | Sequence (5' to 3')                                        |
|---------------------------------------|------------------------------------------------------------|
| <b>ClosTron mutant screening</b>      |                                                            |
| QsrA_F                                | AAGAGGAATTAGCGGGAGCTGAG                                    |
| QsrA_R                                | CGACTTCTGTCAATTTGGTTGAGAAGC                                |
| QsrB_F                                | CGATATTGTTGGAGAAGAAGTTACTC                                 |
| QsrB_R                                | AGATAATCCGCAGTTACATCC                                      |
| QsrC_F                                | TCAAATACTGCCTATTGGCGTAAAGC                                 |
| QsrC_R                                | AGCATTATTTCTGCTGCATGTCTAG                                  |
| QsrD_F                                | GGAGAGTTTTGTCATATGTGTGTC                                   |
| QsrD_R                                | AGCTTGTGATTCCTCATCCTC                                      |
| QsrE_F                                | GATAAGGGAGAAAAGTGCTATGGCAAG                                |
| QsrE_R                                | TCCTCTTGAAAAGGCATCTCTCTT                                   |
| QsrF_F                                | AGATGATATTGTAGGTACAGAACTCAC                                |
| QsrF_R                                | GTCCTGTATGTATGAGGCGATC                                     |
| QsrG_F                                | ACGGCCTAAGTCAAGAAGATCTGG                                   |
| QsrG_R                                | ATTGCTTGCGATTTCTCATCTCCATC                                 |
| QsrH_F                                | GCACTTATGAGATAATGTCTATTGGAGACAAGC                          |
| QsrH_R                                | TGCTGCACTTCTAGTAAGGTTTGCT                                  |
| EBS universal                         | CGAAATTAGAAACTTGC GTTCAGTAAAC                              |
| <b>Cloning</b>                        |                                                            |
| QsrB_C_F1                             | TATATACCTGCAGGCTACACTCAAAAGCATATAAATACG                    |
| QsrB_C_R1                             | TATATAGCGCCGCTTACTTAACTTTATTAATAAATTTAATATTTTATCT<br>ATGTC |
| QsrB_C_F2                             | CTTGGTCATATGGGAAACTGTC                                     |
| QsrB_C_R2                             | AACATCGGATCCTATTACTTACTTAAAC                               |
| QspB_C_F1                             | TGTCTACATATGTTACCAAAAAAGAGTAATAAATTTATATTAG                |
| QspB_C_R1                             | TTTTTAGAATTCGGTTTTTGTTAATGTTATAAAAC                        |
| <b>Southern Blot probe generation</b> |                                                            |
| EBS2                                  | TGAACGCAAGTTTCTAATTTTCGGTTCTCATCCGATAGAGGAAAGTGTCT         |
| Intron Sall-R1                        | ATTACTGTGACTGGTTTGCACCAACCCTCTTCG                          |
